# Supplementary material for: One-step surface modification for irreversible bonding of various plastics with a poly(dimethylsiloxane) elastomer at room temperature
Source: Royal Society of Chemistry journal article supplement (doi:10.1039/c3lc51324f), 2014-01-01
Supplement: c3lc51324f1.pdf [file c3lc51324f1.pdf]

## Electronic Supplementary Information

# One-step surface modification for irreversible bonding of various plastics with poly(dimethylsiloxane) elastomer at room temperature

*Jing Wu and Nae Yoon Lee\**

Department of BioNano Technology, Gachon University, 1342 Seongnam-daero,  
Sujeong-gu, Seongnam, Gyeonggi-do, 461-701, Korea

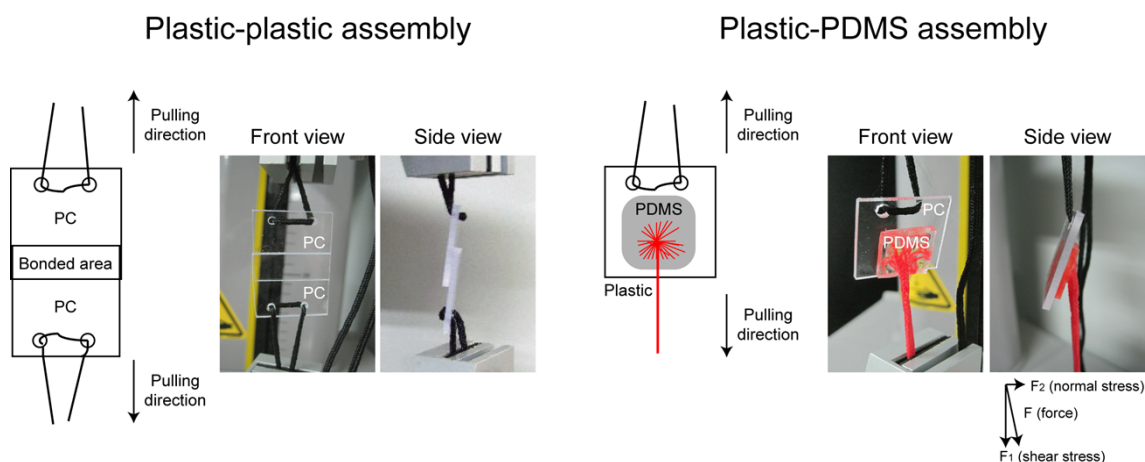

**Fig. S1.** Illustrations and photos showing experimental setups for bond strength measurement for plastic–plastic assembly (in this case, PC) and plastic (PC)–PDMS assembly.

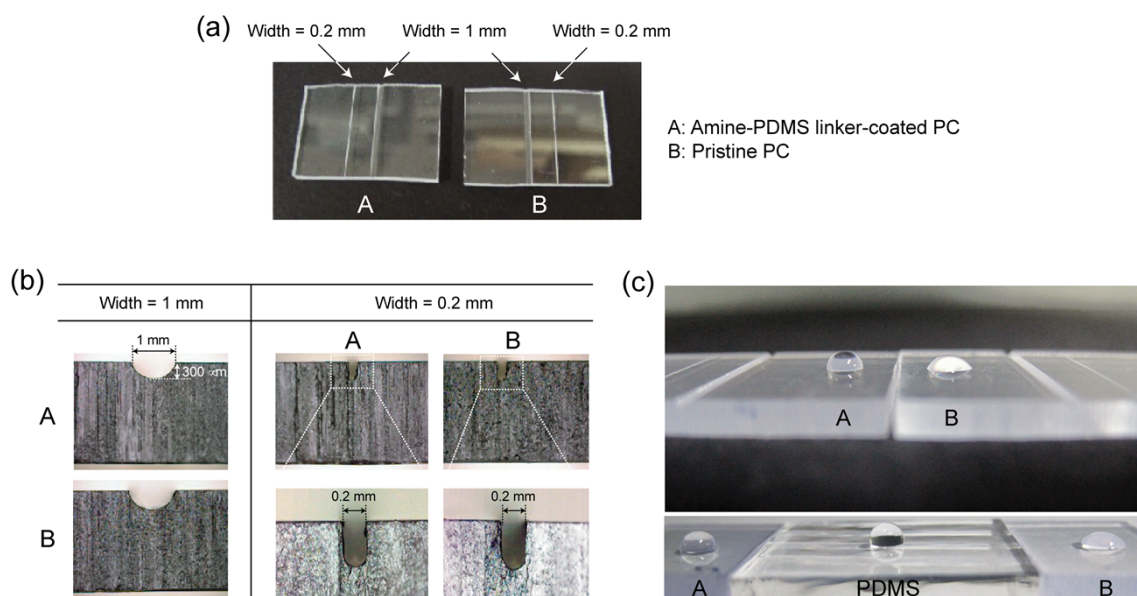

**Fig. S2.** (a) A photo showing pristine and amine-PDMS linker-coated PC engraved with two microchannels in parallel with 0.2 mm and 1 mm in width. (b) Optical microscope images showing the surface profiles before (B) and after (A) coating the PC with amine-PDMS linker. (c) Photos showing water contact angles measured on a pristine PC (B), amine-PDMS linker-coated PC (A), and PDMS.
